# Supplementary material for: The Causality between Diabetes and Venous Thromboembolism: A Bidirectional Two-Sample Mendelian Randomization Study
Source: PubMed Central journal article supplement — Thromb Haemost. 2023 Mar 9;123(9):913–9. doi: 10.1055/a-2040-4850 (PMC10460955; doi:10.1055/a-2040-4850), 2023-03-09
Supplement: 10-1055-a-2040-4850-s22110515.pdf [file 10-1055-a-2040-4850-s22110515.pdf]

## Supplementary Materials

**Supplementary Table S1** Details of GWAS used for exposures and outcomes

| Variables       | Sample size | Case   | Control | No. SNPs   | Participates | Year of release | PMID/source     |
|-----------------|-------------|--------|---------|------------|--------------|-----------------|-----------------|
| Type 1 diabetes | 25,063      | 9,358  | 15,705  | 12,783,129 | European     | 2020            | 32005708        |
| Type 2 diabetes | 659,316     | 62,892 | 596,424 | 5,030,727  | European     | 2018            | 30054458        |
| VTE             | 218,792     | 9,176  | 209,616 | 16,380,466 | European     | 2021            | FinnGen biobank |
| DVT             | 194,604     | 4,576  | 190,028 | 16,380,409 | European     | 2021            | FinnGen biobank |
| PE              | 218,413     | 4,185  | 214,228 | 16,380,466 | European     | 2021            | FinnGen biobank |

Abbreviations: DVT, deep vein thrombosis; GWAS, genome-wide association studies; No. SNPs, number of single-nucleotide polymorphisms; PE, pulmonary embolism; VTE, venous thromboembolism.

**Supplementary Table S2** Distribution of F-statistic for instrumental variables used

| Exposures       | Outcomes        | No. SNPs | F statistic, range | F statistic, mean |
|-----------------|-----------------|----------|--------------------|-------------------|
| Type 1 diabetes | VTE             | 37       | 30.5–1,465.5       | 118.6             |
|                 | DVT             | 37       | 30.5–1,465.5       | 118.6             |
|                 | PE              | 37       | 30.5–1,465.5       | 118.6             |
| Type 2 diabetes | VTE             | 114      | 29.9–1,578.3       | 76.7              |
|                 | DVT             | 114      | 29.9–1,578.3       | 76.7              |
|                 | PE              | 114      | 29.9–1,578.3       | 76.7              |
| VTE             | Type 1 diabetes | 12       | 29.8–354.3         | 107.3             |
|                 | Type 2 diabetes | 6        | 31.2–163.2         | 81.7              |
| DVT             | Type 1 diabetes | 9        | 31.8–369.8         | 104.9             |
|                 | Type 2 diabetes | 5        | 31.8–91.2          | 53.4              |
| PE              | Type 1 diabetes | 6        | 34.9–131.1         | 80.5              |
|                 | Type 2 diabetes | 3        | 34.9–131.1         | 96.8              |

Abbreviations: DVT, deep vein thrombosis; No. SNPs, number of single-nucleotide polymorphisms; PE, pulmonary embolism; VTE, venous thromboembolism.

**Supplementary Table S3** Details of GWAS used for covariates

| Covariates      | Sample size | No. SNPs   | Participates | Year of release | PMID     |
|-----------------|-------------|------------|--------------|-----------------|----------|
| Smoking per day | 337,334     | 11,913,712 | European     | 2019            | 30643251 |
| Body mass index | 315,347     | 27,854,527 | European     | 2018            | 30108127 |

Abbreviation: GWAS, genome-wide association studies; No. SNPs, number of single-nucleotide polymorphisms.

**Supplementary Table S4** The results of sensitivity analysis for associations between diabetes and VTE

| Exposures       | Outcomes | Methods         | No. SNPs | OR (95% CI)      | p-Value |
|-----------------|----------|-----------------|----------|------------------|---------|
| Type 1 diabetes | VTE      | MR Egger        | 37       | 0.96 (0.94–0.99) | 0.008   |
|                 |          | Weighted median | 37       | 0.96 (0.94–0.99) | 0.001   |
|                 |          | Weighted mode   | 37       | 0.96 (0.94–0.98) | 0.002   |
|                 | DVT      | MR Egger        | 37       | 0.95 (0.91–0.98) | 0.004   |
|                 |          | Weighted median | 37       | 0.96 (0.93–0.99) | 0.018   |
|                 |          | Weighted mode   | 37       | 0.96 (0.94–0.99) | 0.018   |
|                 | PE       | MR Egger        | 37       | 0.97 (0.94–1.01) | 0.185   |
|                 |          | Weighted median | 37       | 0.96 (0.93–0.99) | 0.017   |
|                 |          | Weighted mode   | 37       | 0.97 (0.94–1.00) | 0.039   |
| Type 2 diabetes | VTE      | MR Egger        | 114      | 0.90 (0.79–1.04) | 0.149   |
|                 |          | Weighted median | 114      | 0.92 (0.84–1.01) | 0.068   |
|                 |          | Weighted mode   | 114      | 0.92 (0.83–1.02) | 0.118   |
|                 | DVT      | MR Egger        | 114      | 0.94 (0.78–1.12) | 0.488   |
|                 |          | Weighted median | 114      | 0.96 (0.85–1.08) | 0.501   |
|                 |          | Weighted mode   | 114      | 0.96 (0.84–1.10) | 0.539   |
|                 | PE       | MR Egger        | 114      | 0.94 (0.79–1.11) | 0.481   |
|                 |          | Weighted median | 114      | 0.98 (0.87–1.11) | 0.780   |
|                 |          | Weighted mode   | 114      | 0.97 (0.82–1.15) | 0.718   |

Abbreviations: CI, confidence interval; DVT, deep vein thrombosis; No. SNPs, number of single-nucleotide polymorphisms; OR, odds ratio; PE, pulmonary embolism; VTE, venous thromboembolism.

**Supplementary Table S5** The results of pleiotropy analysis for associations between diabetes and VTE

| Exposures       | Outcomes | Intercept | p-Value |
|-----------------|----------|-----------|---------|
| Type 1 diabetes | VTE      | 0.011     | 0.064   |
|                 | DVT      | 0.019     | 0.014   |
|                 | PE       | 0.005     | 0.573   |
| Type 2 diabetes | VTE      | 0.006     | 0.269   |
|                 | DVT      | 0.002     | 0.811   |
|                 | PE       | 0.002     | 0.723   |

Abbreviations: DVT, deep vein thrombosis; MR, Mendelian randomization; PE, pulmonary embolism; VTE, venous thromboembolism.

Note: The potential pleiotropy was tested by MR egger regression. An intercept value of MR egger regression not statistically different from the null ( $p > 0.05$ ) suggested that there was no horizontal pleiotropy.

**Supplementary Table S6** The results of sensitivity analysis for associations between VTE and diabetes

| Exposures | Outcomes        | Methods         | No. SNPs | OR (95% CI)      | p Value |
|-----------|-----------------|-----------------|----------|------------------|---------|
| VTE       | Type 1 diabetes | MR Egger        | 12       | 0.97 (0.86–1.10) | 0.689   |
|           |                 | Weighted median | 12       | 0.99 (0.90–1.10) | 0.904   |
|           |                 | Weighted mode   | 12       | 0.98 (0.87–1.11) | 0.778   |
|           | Type 2 diabetes | MR Egger        | 6        | 0.95 (0.79–1.14) | 0.592   |
|           |                 | Weighted median | 6        | 1.06 (1.00–1.12) | 0.054   |
|           |                 | Weighted mode   | 6        | 1.05 (0.98–1.13) | 0.213   |
| DVT       | Type 1 diabetes | MR Egger        | 9        | 0.99 (0.90–1.10) | 0.906   |
|           |                 | Weighted median | 9        | 1.00 (0.92–1.07) | 0.903   |
|           |                 | Weighted mode   | 9        | 0.98 (0.91–1.07) | 0.714   |
|           | Type 2 diabetes | MR Egger        | 5        | 0.93 (0.59–1.48) | 0.788   |
|           |                 | Weighted median | 5        | 1.05 (0.99–1.11) | 0.102   |
|           |                 | Weighted mode   | 5        | 1.04 (0.96–1.13) | 0.375   |
| PE        | Type 1 diabetes | MR Egger        | 6        | 1.08 (0.78–1.49) | 0.675   |
|           |                 | Weighted median | 6        | 1.00 (0.88–1.14) | 0.983   |
|           |                 | Weighted mode   | 6        | 1.08 (0.86–1.35) | 0.551   |
|           | Type 2 diabetes | MR Egger        | 3        | 0.93 (0.71–1.23) | 0.715   |
|           |                 | Weighted median | 3        | 1.05 (1.00–1.10) | 0.070   |
|           |                 | Weighted mode   | 3        | 1.05 (0.98–1.13) | 0.323   |

Abbreviations: CI, confidence interval; DVT, deep vein thrombosis; No. SNPs, number of single-nucleotide polymorphisms; OR, odds ratio; PE, pulmonary embolism; VTE, venous thromboembolism.

**Supplementary Table S7** The results of pleiotropy analysis for associations between VTE and diabetes

| Exposures | Outcomes        | Intercept | p-Value |
|-----------|-----------------|-----------|---------|
| VTE       | Type 1 diabetes | 0.003     | 0.887   |
|           | Type 2 diabetes | 0.017     | 0.342   |
| DVT       | Type 1 diabetes | −0.012    | 0.541   |
|           | Type 2 diabetes | 0.021     | 0.662   |
| PE        | Type 1 diabetes | −0.028    | 0.570   |
|           | Type 2 diabetes | 0.023     | 0.631   |

Abbreviations: DVT, deep vein thrombosis; MR, Mendelian randomization; PE, pulmonary embolism; VTE, venous thromboembolism.

Note: The potential pleiotropy was tested by MR Egger regression. An intercept value of MR Egger regression not statistically different from the null ( $p > 0.05$ ) suggested that there was no horizontal pleiotropy.
